# Supplementary material for: Visible light degradable micelles for intraocular corticosteroid delivery
Source: Royal Society of Chemistry journal article supplement (doi:10.1039/d3tb02793g), 2024-01-01
Supplement: d3tb02793g1.pdf [file d3tb02793g1.pdf]

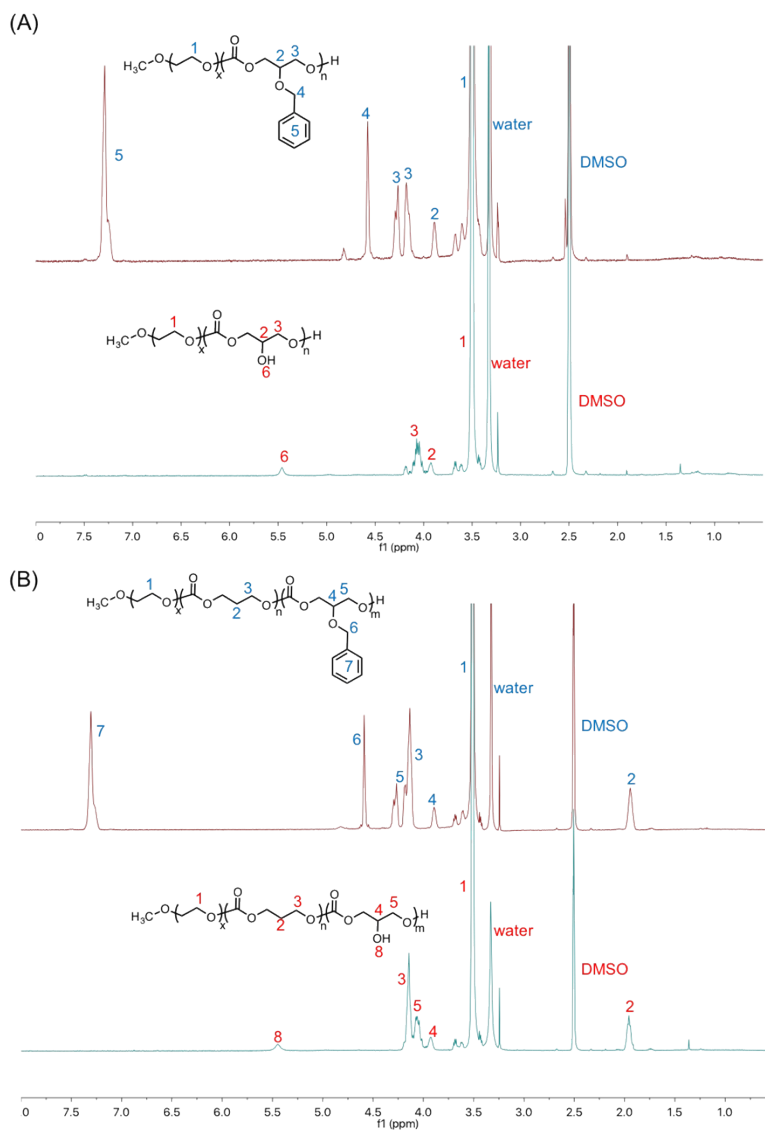

**Figure S1:** Representative <sup>1</sup>H NMR spectra of mPEG-*b*-PHTMC and mPEG-*b*-P(TMC-*co*-HTMC) before and after debenzylation. <sup>1</sup>H NMR spectra of mPEG-*b*-P(BTMC)<sub>13</sub> (A top), mPEG-*b*-P(HTMC)<sub>5</sub> (A bottom), mPEG-*b*-P(TMC<sub>10</sub>-*co*-BTMC<sub>10</sub>) (B top) and mPEG-*b*-P(TMC<sub>9</sub>-*co*-BTMC<sub>9</sub>) (B bottom).

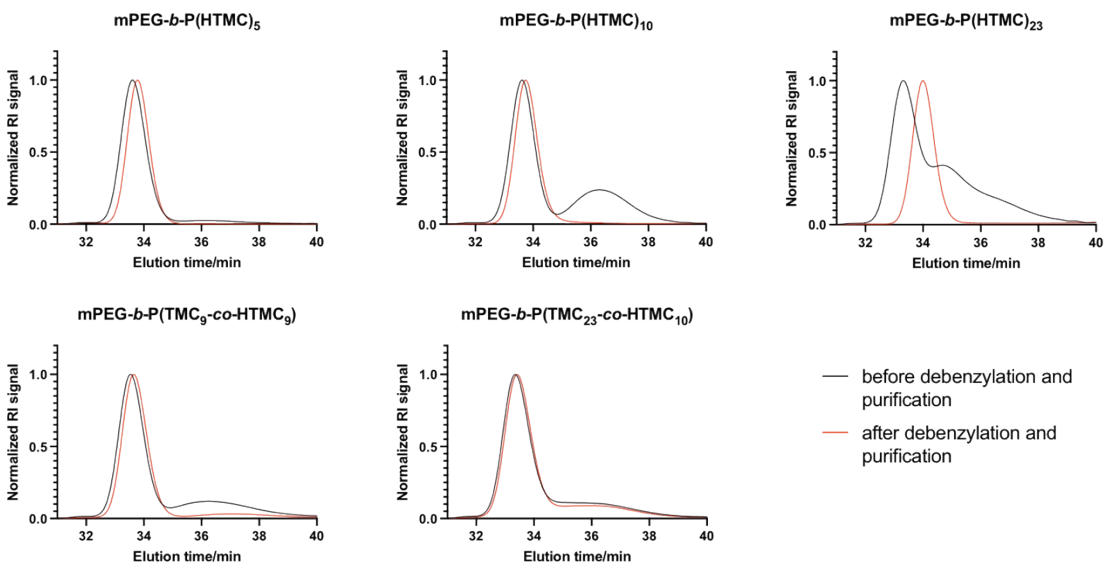

**Figure S2.** GPC chromatograms of mPEG-b-PHTMC's and mPEG-b-P(TMC-co-HTMC)'s before and after debenzylation and purification.

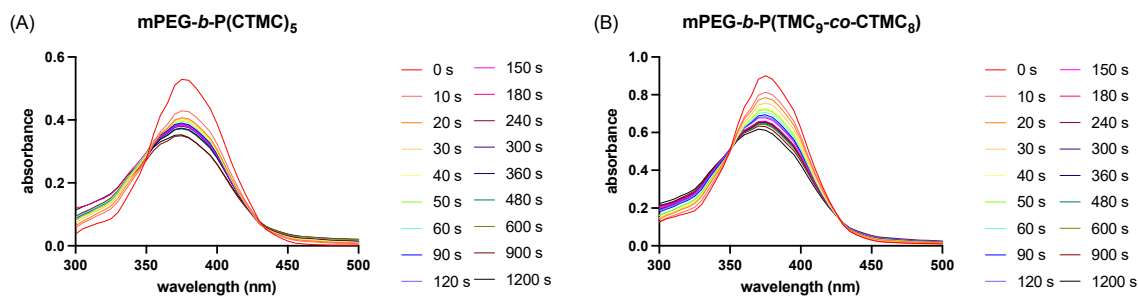

**Figure S3:** Representative absorbance spectra of micelles suspensions post visible light irradiation (20 min, 28 mW/cm<sup>2</sup>) over varying time. Absorbance spectra of (A) mPEG-*b*-P(CTMC)<sub>5</sub> and (B) mPEG-*b*-P(TMC<sub>9</sub>-*co*-CTMC<sub>8</sub>).

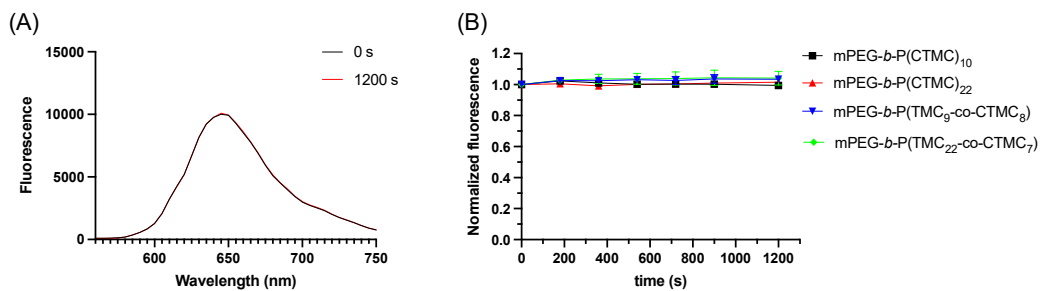

**Figure S4:** (A) Fluorescence spectrum of Nile Red in acetonitrile/water 50/50 before and after visible light irradiation. (B) Plots of normalized fluorescence vs irradiation time for Nile Red-loaded micelles in PBS in the absence of visible light.
